# Supplementary material for: Adsorptive Elimination of a Cationic Dye and a Hg (II)-Containing Antiseptic from Simulated Wastewater Using a Metal Organic Framework
Source: MDPI journal article supplement (doi:10.3390/molecules29040886), 2024-02-17
Supplement: s1 [file s1]

Supporting information for

# **Adsorptive Elimination of a Cationic Dye and a Hg (II)-Containing Antiseptic from Simulated Wastewater Using a Metal Organic Framework**

Nilanjan Roy<sup>1</sup>, Chanchal Das<sup>1</sup>, Mohuya Paul<sup>2</sup>, Jungkyun Im<sup>2,3\*</sup>, and  
Goutam Biswas<sup>1\*</sup>

<sup>1</sup>*Department of Chemistry, Cooch Behar Panchanan Barma University, Cooch Behar, West Bengal, India 736101*

<sup>2</sup>*Department of Electronic Materials, Devices and Equipment Engineering,*

<sup>3</sup>*Department of Chemical Engineering, Soonchunhyang University, Asan 31538, Republic of Korea*

**\*Corresponding Authors:** Dr. Goutam Biswas, Department of Chemistry, Cooch Behar Panchanan Barma University, Cooch Behar-736101, West Bengal, India; Email address: [goutam@cbpbu.ac.in](mailto:goutam@cbpbu.ac.in), and Prof. Jungkyun Im, Department of Electronic Materials, Devices and Equipment Engineering, Soonchunhyang University, Asan, Republic of Korea; Email address: [jkim5279@sch.ac.kr](mailto:jkim5279@sch.ac.kr)

## 1. EDS analysis

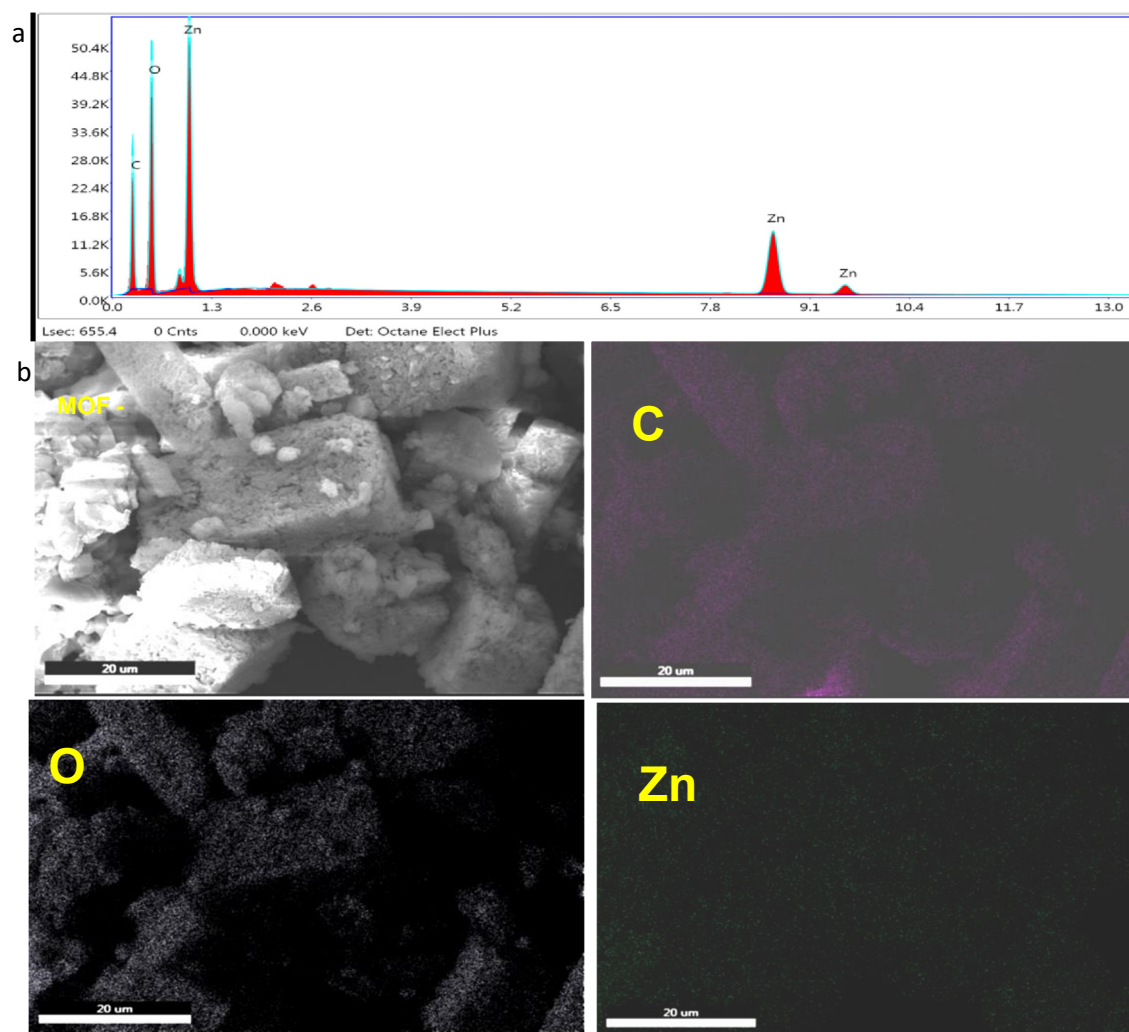

**Figure S1:** a. EDS spectra of as synthesized MOF-5 and b. elemental mapping of MOF-5.

## 2. Effect of contact time and adsorption kinetics

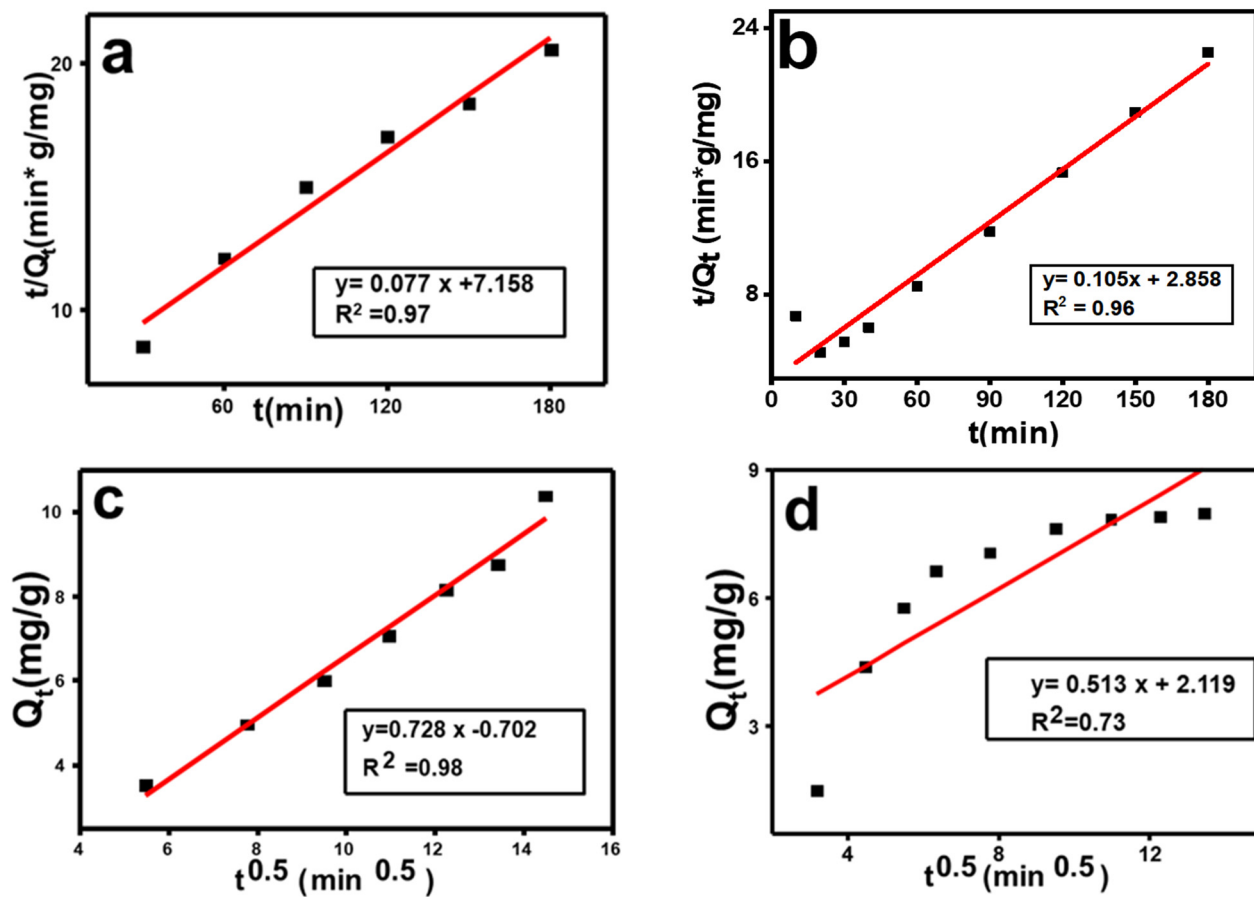

**Figure S2:** (a) pseudo second order plot of merbromin removal, (b) pseudo second order plot of safranin O removal, (c) intra-particle diffusion of merbromin removal, (d) intra particle diffusion of safranin O removal

**Table S1: Statistical data for different Adsorption Kinetics**

| Adsorbate  | Concentration<br>(mg L <sup>-1</sup> ) | order                                 | Equation                                              | R <sup>2</sup> | Rate<br>constant<br>(k) | Qe(exp)<br>(mg/g) | Qe(cal)<br>(mg/g) |
|------------|----------------------------------------|---------------------------------------|-------------------------------------------------------|----------------|-------------------------|-------------------|-------------------|
| Safranin O | 15                                     | Pseudo 1 <sup>st</sup> order kinetics | $\ln (q_e - q_t) = \ln q_e - k_1 t$                   | 0.989          | 0.030                   | 7.990             | 6.221             |
|            |                                        | Pseudo 2 <sup>nd</sup> order kinetics | $\frac{t}{q_t} = \frac{1}{k_2 q_e^2} + \frac{t}{q_e}$ | 0.967          | 0.005                   | 7.990             | 9.523             |
|            |                                        | Intraparticle diffusion               | $q_t = k_i t^{0.5} + C$                               | 0.731          | 0.513                   | 7.990             | -----             |
| Merbromin  | 25                                     | Pseudo 1 <sup>st</sup> order kinetics | $\ln (q_e - q_t) = \ln q_e - k_1 t$                   | 0.987          | 0.009                   | 10.373            | 9.757             |
|            |                                        | Pseudo 2 <sup>nd</sup> order kinetics | $\frac{t}{q_t} = \frac{1}{k_2 q_e^2} + \frac{t}{q_e}$ | 0.974          | 0.001                   | 10.373            | 12.987            |
|            |                                        | Intraparticle diffusion               | $q_t = k_i t^{0.5} + C$                               | 0.984          | 0.728                   | 10.373            | -----             |

### 3. Effect of adsorbate dosage and adsorption Isotherm

The linear form of Langmuir adsorption isotherm is,

$$\frac{C_e}{Q_e} = \frac{1}{Q_m K_L} + \frac{C_e}{Q_m} \dots \dots \dots (S1)$$

Whereas the nonlinear form is,  $Q_e = \frac{Q_{max} K_L C_e}{(1 + K_L C_e)} \dots \dots \dots (S2)$

On the other hand, the linear form of Freundlich isotherm is,

$$\ln Q_e = \ln K_p + \frac{1}{n} \ln C_e \dots \dots \dots (S3)$$

And the nonlinear form of this isotherm is,  $Q_e = K_F C_e^{1/n} \dots \dots \dots (S4)$

Where  $C_o$  = initial concentration of adsorbate in mg/L,  $C_e$  = equilibrium concentration of (adsorbate + adsorbent),  $Q_e$  = adsorption capacity in mg/g,  $K_L$  = Langmuir constant,  $Q_m$  = maximum adsorption capacity,  $K_p$  = Freundlich constant,  $n$  = separation factor. if the intensity( $1/n$ ) is within 0 to1 i.e., if separation factor  $>1$  then only the Freundlich adsorption is favorable. [59,73–75].

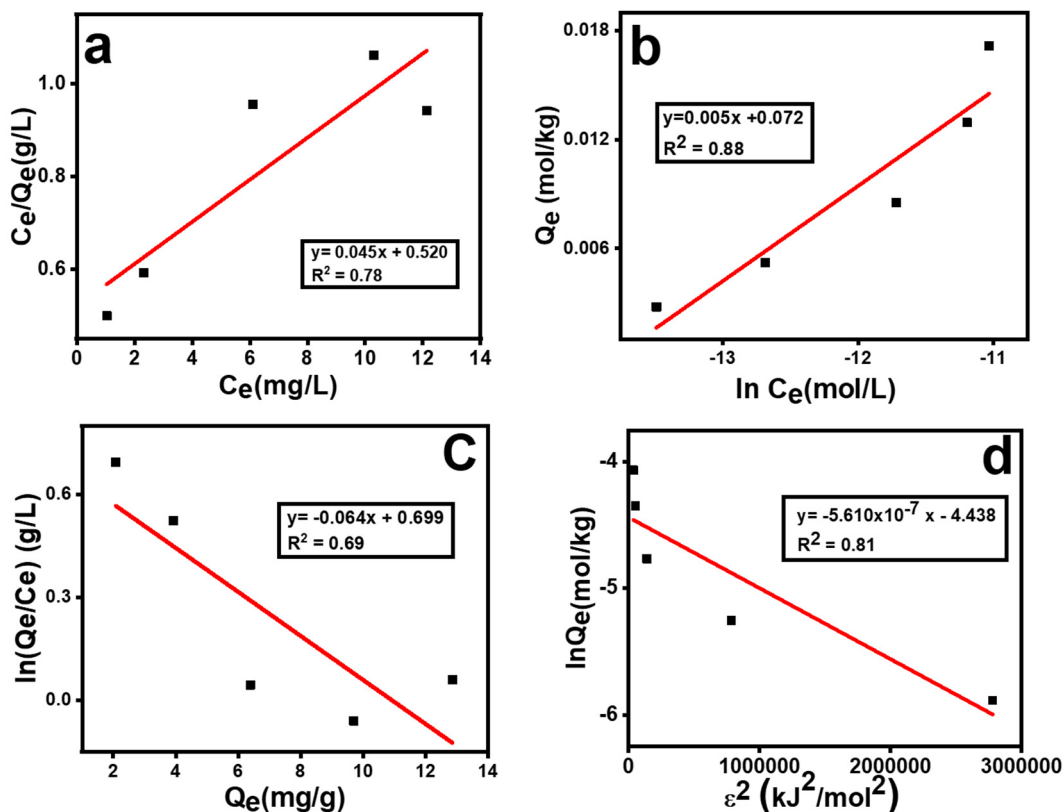

**Figure S3:** Different Adsorption Isotherms for Merbromin adsorption onto MOF-5 (a) Langmuir isotherm, (b) Temkin isotherm, (c) Elovich isotherm, (d) Dubinin-Radushkevich isotherm

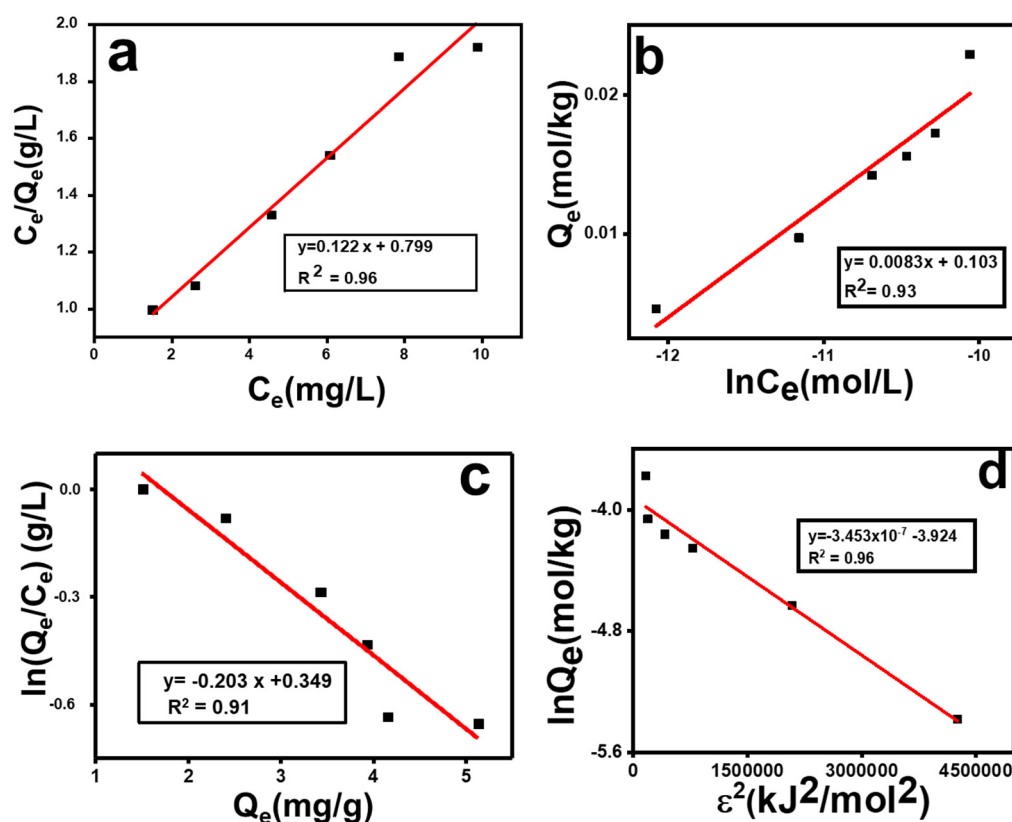

**Figure S4:** Different Adsorption Isotherms for Safranin O adsorption onto MOF-5 (a) Langmuir isotherm, (b) Temkin isotherm, (c) Elovich isotherm, (d) Dubinin-Radushkevich isotherm

**Table S2: Statistical data for different adsorption isotherm**

| Isotherm                                                                       | Parameter                                                      | Value                  |                        |
|--------------------------------------------------------------------------------|----------------------------------------------------------------|------------------------|------------------------|
|                                                                                |                                                                | Merbromin              | Safranin O             |
| Freundlich<br>$(\ln Q_e = \frac{1}{n} \ln C_e + \ln K_F)$                      | $K_F [\text{mg} \cdot \text{g}^{-1}(\text{mg L}^{-1})^{-1/n}]$ | 2.04                   | 1.24                   |
|                                                                                | n                                                              | 1.445                  | 1.609                  |
|                                                                                | $R^2_{\text{Adj}}$                                             | 0.979                  | 0.97543                |
|                                                                                | $R^2$                                                          | 0.98425                | 0.98034                |
| Langmuir<br>$(\frac{C_e}{Q_e} = \frac{C_e}{Q_{\max}} + \frac{1}{Q_{\max}K_L})$ | $Q_{\max} (\text{mg/g})$                                       | 22.22                  | 8.19                   |
|                                                                                | $R^2_{\text{Adj}}$                                             | 0.713                  | 0.957                  |
|                                                                                | $R^2$                                                          | 0.785                  | 0.966                  |
| Temkin<br>$(Q_e = B \ln A + B \ln C_e)$                                        | $R^2_{\text{Adj}}$                                             | 0.852                  | 0.975                  |
|                                                                                | $R^2$                                                          | 0.889                  | 0.938                  |
|                                                                                | $B(\text{kJ/mol})$                                             | 0.005                  | 0.0083                 |
| Elovich<br>$(\frac{Q_e}{Q_m} = K_E C_e e^{-\frac{Q_e}{Q_m}})$                  | $R^2_{\text{Adj}}$                                             | 0.596                  | 0.898                  |
|                                                                                | $R^2$                                                          | 0.690                  | 0.918                  |
|                                                                                | $Q_m$                                                          | 15.625                 | 4.926                  |
| Dubinin-Radushkevich<br>$(\ln Q_e = \ln Q_0 - \beta \epsilon^2)$               | $R^2_{\text{Adj}}$                                             | 0.085                  | 0.602                  |
|                                                                                | $R^2$                                                          | 0.814                  | 0.962                  |
|                                                                                | $\beta(\text{mol}^2/\text{kJ}^2)$                              | $5.610 \times 10^{-7}$ | $3.453 \times 10^{-7}$ |
|                                                                                | $\ln Q_0$                                                      | -4.438                 | -3.924                 |

#### 4. Thermodynamics of Adsorption

**Table S3: Thermodynamic parameters for dye adsorption onto MOF-5.**

| Adsorbate  | T(°K) | ln (C <sub>e</sub> ) | ΔH<br>(kJ/mol) | ΔS<br>(J/mol. K) | ΔG<br>(J/mol) |
|------------|-------|----------------------|----------------|------------------|---------------|
| Safranin O | 289   | -1.92                | 18.77          | 78.35            | -3866.02      |
|            | 299   | -1.69                |                | 76.17            | -3999.79      |
|            | 309   | -1.44                |                | 74.14            | -4133.56      |
|            | 319   | -1.19                |                | 72.23            | -4267.34      |
| Merbromin  | 289   | -2.59                | 11.16          | 50.64            | -3471.97      |
|            | 299   | -2.39                |                | 49.35            | -3592.11      |
|            | 309   | -2.27                |                | 48.14            | -3712.24      |
|            | 319   | -2.15                |                | 47.01            | -3832.38      |

**Table S4: Various parameters in Kochbihar lake water.**

| parameters                          | Amount | Unit      |
|-------------------------------------|--------|-----------|
| Ammonia-N                           | 0.53   | mg/l      |
| BOD                                 | 1.80   | mg/l      |
| Conductivity                        | 55.21  | μs/cm     |
| Dissolved O <sub>2</sub> (DO)       | 6.20   | mg/l      |
| Fecal Coliform                      | 2300   | MPN/100ml |
| Nitrate-N                           | 0.21   | mg/l      |
| pH                                  | 7.19   | Unit      |
| Temperature (Water)                 | 27     | °C        |
| Total Coliform                      | 8000   | MPN/100ml |
| Boron                               | 3.44   | mg/l      |
| Sodium                              | 2.30   | mg/l      |
| Sulphate                            | 6.28   | mg/l      |
| Total Alkalinity                    | 30.00  | mg/l      |
| Total Dissolved Solids (TDS)        | 32.00  | mg/l      |
| Total Fixed Solids (TFS)            | 28.00  | mg/l      |
| Total Hardness as CaCO <sub>3</sub> | 24.00  | mg/l      |
| Total Suspended Solids (TSS)        | 10.00  | mg/l      |



|                            |       |      |
|----------------------------|-------|------|
| Turbidity                  | 0.72  | NTU  |
| Calcium                    | 8.00  | mg/l |
| Chloride                   | 14.67 | mg/l |
| COD                        | 36.72 | mg/l |
| Fluoride                   | 0.35  | mg/l |
| Magnesium                  | 0.97  | mg/l |
| Phenolphthalein Alkalinity | NIL   | mg/l |
| Phosphate-P                | 0.15  | mg/l |
| Potassium                  | 0.80  | mg/l |

Reference: WBPCB (<https://www.wbpcb.gov.in>)
